# Supplementary material for: First Detection of Algal Caribbean Ciguatoxin in Amberjack Causing Ciguatera Poisoning in the Canary Islands (Spain)
Source: MDPI journal article supplement (doi:10.3390/toxins16040189), 2024-04-13
Supplement: s1 [file s1]

# Supplementary Materials: First Detection of Algal Caribbean Ciguatoxin in Amberjack Causing Ciguatera Poisoning in the Canary Islands (Spain)

Pablo Estevez, Juan Osés-Prieto, David Castro, Alejandro Penin, Alma Burlingame and Ana Gago-Martínez

**Table S1.** Mass error of C-CTX1 fragments after PRM analyses of C-CTX1 standard (20 ng/mL) selecting  $m/z$  1123.6200  $[M+H-H_2O]^+$  as a precursor ion at a CE of 15.

| Ion             | Molecular Formula      | Theoretical $m/z$ | Measured $m/z$ | Error (ppm) |
|-----------------|------------------------|-------------------|----------------|-------------|
| $[M+H-H_2O]^+$  | $C_{62}H_{91}O_{18}^+$ | 1123.6200         | 1123.6218      | 1.6         |
| $[M+H-2H_2O]^+$ | $C_{62}H_{89}O_{17}^+$ | 1105.6094         | 1105.6099      | 0.5         |
| $[M+H-3H_2O]^+$ | $C_{62}H_{87}O_{16}^+$ | 1087.5989         | 1087.5992      | 0.3         |
| q <sub>13</sub> | $C_{55}H_{79}O_{15}^+$ | 979.5414          | 979.5397       | -1.7        |
| q <sub>11</sub> | $C_{46}H_{63}O_{12}^+$ | 807.4314          | 807.4366       | 6.4         |
| s' <sub>7</sub> | $C_{31}H_{45}O_8^+$    | 545.3109          | 545.3126       | 3.1         |
| s' <sub>3</sub> | $C_{14}H_{21}O_4^+$    | 253.1434          | 253.1435       | 0.4         |
| p <sub>3</sub>  | $C_{12}H_{17}O_3^+$    | 209.1172          | 209.1172       | 0.0         |
| r' <sub>1</sub> | $C_{11}H_{17}O_2^+$    | 181.1223          | 181.1225       | 1.1         |

**Table S2.** Mass error of C-CTX1 fragments after PRM analyses of C-CTX1 in amberjack sample selecting  $m/z$  1123.6200  $[M+H-H_2O]^+$  as a precursor ion at a CE of 15.

| Ion             | Molecular Formula      | Theoretical $m/z$ | Measured $m/z$ | Error (ppm) |
|-----------------|------------------------|-------------------|----------------|-------------|
| $[M+H-H_2O]^+$  | $C_{62}H_{91}O_{18}^+$ | 1123.6200         | 1123.6174      | -2.3        |
| $[M+H-2H_2O]^+$ | $C_{62}H_{89}O_{17}^+$ | 1105.6094         | 1105.6077      | -1.5        |
| $[M+H-3H_2O]^+$ | $C_{62}H_{87}O_{16}^+$ | 1087.5989         | 1087.5968      | -1.9        |
| q <sub>13</sub> | $C_{55}H_{79}O_{15}^+$ | 979.5414          | 979.5388       | -2.7        |
| q <sub>11</sub> | $C_{46}H_{63}O_{12}^+$ | 807.4314          | 807.4319       | 0.6         |
| s' <sub>7</sub> | $C_{31}H_{45}O_8^+$    | 545.3109          | 545.3104       | -0.9        |
| s' <sub>3</sub> | $C_{14}H_{21}O_4^+$    | 253.1434          | 253.1427       | -2.8        |
| p <sub>3</sub>  | $C_{12}H_{17}O_3^+$    | 209.1172          | 209.1167       | -2.4        |
| r' <sub>1</sub> | $C_{11}H_{17}O_2^+$    | 181.1223          | 181.1219       | -2.2        |

**Table S3.** Mass error of 17-hydroxy-C-CTX1 fragments after PRM analyses of 17-hydroxy-C-CTX1 in amberjack sample selecting  $m/z$  1139.6149  $[M+H-H_2O]^+$  as a precursor ion at a CE of 15.

| Ion             | Molecular Formula      | Theoretical $m/z$ | Measured $m/z$ | Error (ppm) |
|-----------------|------------------------|-------------------|----------------|-------------|
| $[M+H-H_2O]^+$  | $C_{62}H_{91}O_{19}^+$ | 1139.6149         | 1139.6133      | -1.4        |
| $[M+H-2H_2O]^+$ | $C_{62}H_{89}O_{18}^+$ | 1121.6043         | 1121.6025      | -1.6        |
| $[M+H-3H_2O]^+$ | $C_{62}H_{87}O_{17}^+$ | 1103.5938         | 1103.5913      | -2.2        |
| q <sub>13</sub> | $C_{55}H_{79}O_{16}^+$ | 995.5363          | 995.5352       | -1.1        |
| q <sub>11</sub> | $C_{46}H_{63}O_{13}^+$ | 823.4263          | 823.4248       | -1.8        |
| s' <sub>7</sub> | $C_{31}H_{45}O_8^+$    | 545.3109          | 545.3100       | -1.7        |
| s' <sub>3</sub> | $C_{14}H_{21}O_4^+$    | 253.1434          | 253.1427       | -2.8        |
| p <sub>3</sub>  | $C_{12}H_{17}O_3^+$    | 209.1172          | 209.1167       | -2.4        |
| r' <sub>1</sub> | $C_{11}H_{17}O_2^+$    | 181.1223          | 181.1222       | -0.6        |

**Table S4.** Mass error of C-CTX5 fragments after PRM analyses of C-CTX5 in amberjack sample selecting  $m/z$  1121.6043  $[M+H-H_2O]^+$  as a precursor ion at a CE of 15.

| Ion             | Molecular Formula      | Theoretical $m/z$ | Measured $m/z$ | Error (ppm) |
|-----------------|------------------------|-------------------|----------------|-------------|
| $[M+H-H_2O]^+$  | $C_{62}H_{89}O_{18}^+$ | 1121.60434        | 1121.6056      | 1.1         |
| $[M+H-2H_2O]^+$ | $C_{62}H_{87}O_{17}^+$ | 1103.59378        | 1103.5943      | 0.5         |
| $[M+H-3H_2O]^+$ | $C_{62}H_{85}O_{16}^+$ | 1085.58321        | 1085.5832      | 0.0         |
| $[M+H-4H_2O]^+$ | $C_{62}H_{83}O_{15}^+$ | 1067.57265        | 1067.5709      | -1.6        |
| $[M+H-5H_2O]^+$ | $C_{62}H_{81}O_{14}^+$ | 1049.56208        | 1049.5566      | -5.2        |
| q <sub>13</sub> | $C_{55}H_{79}O_{15}^+$ | 977.5257          | 977.5247       | -1.0        |
| s' <sub>7</sub> | $C_{31}H_{47}O_9^+$    | 563.3215          | 563.3206       | -1.6        |
| s' <sub>7</sub> | $C_{31}H_{45}O_8^+$    | 545.3109          | 545.3094       | -2.8        |
| s' <sub>7</sub> | $C_{31}H_{43}O_7^+$    | 527.3003          | 527.2996       | -1.3        |
| s' <sub>7</sub> | $C_{31}H_{41}O_6^+$    | 509.2898          | 509.2871       | -5.3        |
| p' <sub>3</sub> | $C_{16}H_{25}O_4^+$    | 281.1747          | 281.1742       | -1.8        |
| p' <sub>3</sub> | $C_{16}H_{23}O_3^+$    | 263.1642          | 263.1639       | -1.1        |
| s' <sub>3</sub> | $C_{14}H_{21}O_4^+$    | 253.1434          | 253.1429       | -2.0        |
| p' <sub>3</sub> | $C_{16}H_{21}O_2^+$    | 245.1536          | 245.1528       | -3.3        |
| s' <sub>3</sub> | $C_{14}H_{19}O_3^+$    | 235.1329          | 235.1322       | -3.0        |
| q' <sub>3</sub> | $C_{13}H_{19}O_3^+$    | 223.1329          | 223.1327       | -0.9        |
| p <sub>3</sub>  | $C_{12}H_{17}O_3^+$    | 209.1172          | 209.1169       | -1.4        |
| p <sub>3</sub>  | $C_{12}H_{15}O_2^+$    | 191.1067          | 191.1066       | -0.5        |
| r' <sub>1</sub> | $C_{11}H_{17}O_2^+$    | 181.1223          | 181.1221       | -1.1        |

**Table S5.** Mass error of C-CTX5 fragments after PRM analyses of C-CTX5 in amberjack sample selecting  $m/z$  1121.6043  $[M+H-H_2O]^+$  as a precursor ion at a CE of 40.

| Ion    | Molecular Formula   | Theoretical<br>$m/z$ | Measured<br>$m/z$ | Error (ppm) |
|--------|---------------------|----------------------|-------------------|-------------|
| $s'_3$ | $C_{14}H_{19}O_3^+$ | 235.1329             | 235.1320          | -3.8        |
| $s'_3$ | $C_{14}H_{17}O_2^+$ | 217.1223             | 217.1225          | 0.9         |
| $p_3$  | $C_{12}H_{17}O_3^+$ | 209.1172             | 209.1166          | -2.9        |
| $p_3$  | $C_{12}H_{15}O_2^+$ | 191.1067             | 191.1059          | -4.2        |
| $r'_1$ | $C_{11}H_{17}O_2^+$ | 181.1223             | 181.1216          | -3.9        |
| $p_2$  | $C_9H_{13}O_2^+$    | 153.0910             | 153.0909          | -0.7        |
| $q'_2$ | $C_9H_{11}O^+$      | 135.0804             | 135.0806          | 1.5         |
| $q_2$  | $C_7H_9O^+$         | 109.0648             | 109.0649          | 0.9         |
| $s'_1$ | $C_6H_7O^+$         | 95.0491              | 95.0494           | 3.2         |
